# Supplementary material for: Extraction of diazinon, haloxyfop-R-methyl, hexaconazole, diniconazole, and triticonazole in cheese samples using a ferrofluid based liquid phase extraction method prior to gas chromatography
Source: Royal Society of Chemistry journal article supplement (doi:10.1039/d3ay00160a), 2023-01-01
Supplement: d3ay00160a1.pdf [file d3ay00160a1.pdf]

**Extraction of diazinon, haloxyfop-R-methyl, hexaconazole, diniconazole, and triticonazole in cheese samples using a ferrofluid based liquid phase extraction method prior to gas chromatography**

Mahdi Rouhi<sup>1</sup>, Jafar Abolhasani<sup>1\*</sup>, Mohammad Reza Afshar Mogaddam<sup>2,3</sup>, Mohammad Taghi Vardini<sup>1</sup>

<sup>1</sup> *Department of Chemistry, Tabriz Branch, Islamic Azad University, Tabriz, Iran*

<sup>2</sup> *Food and Drug Safety Research Center, Tabriz University of Medical Sciences, Tabriz, Iran*

<sup>3</sup> *Pharmaceutical Analysis Research Center, Tabriz University of Medical Sciences, Tabriz, Iran*

\* Corresponding author: Dr. J. Abolhasani

Tel.: +98 9141028230

E-mail address: [abolhasani@iaut.ac.ir](mailto:abolhasani@iaut.ac.ir)

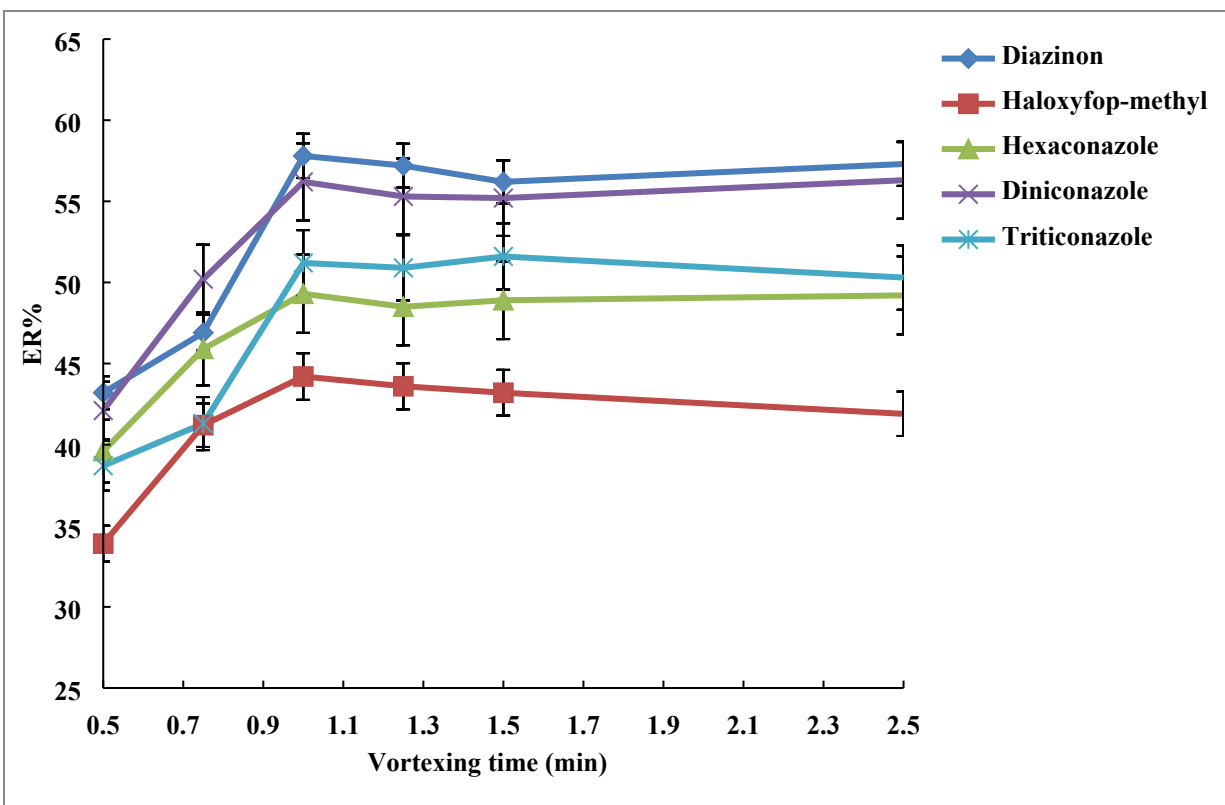

Fig. S1. Optimization of vortexing time.

Extraction conditions: Sample, 1 g blank cheese spiked with 100 ng g<sup>-1</sup> of each analyte; extraction solvent type (volume), ACN (1.5 mL); TCA solution concentration (volume), 10% w/v (1 mL); NaCl concentration, 20 % w/v; Vortexing time, 2.5 min; centrifugation time (speed), 5 min (5000 rpm); ferrofluid volume, 100 μL; back-extraction solvent (volume), *n*-hexane (75 μL); and vortex time, 2 min. The error bars indicate the standard deviations of three repeated determinations.

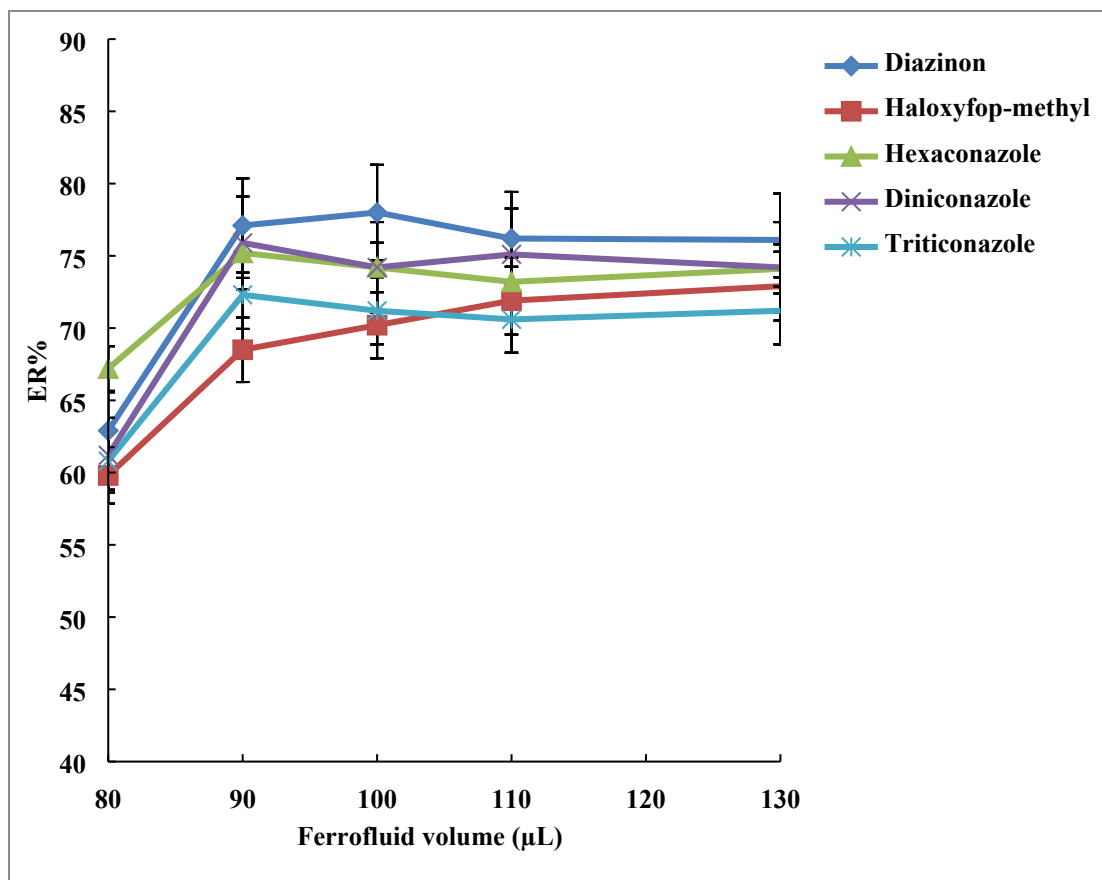

Fig. S2. Optimization of ferrofluid volume.

Extraction conditions: are the same as those used in Fig. S1, except 1 min and 1.5 mL TCA solution (15% w/v) were the vortexing time and precipitation agent.

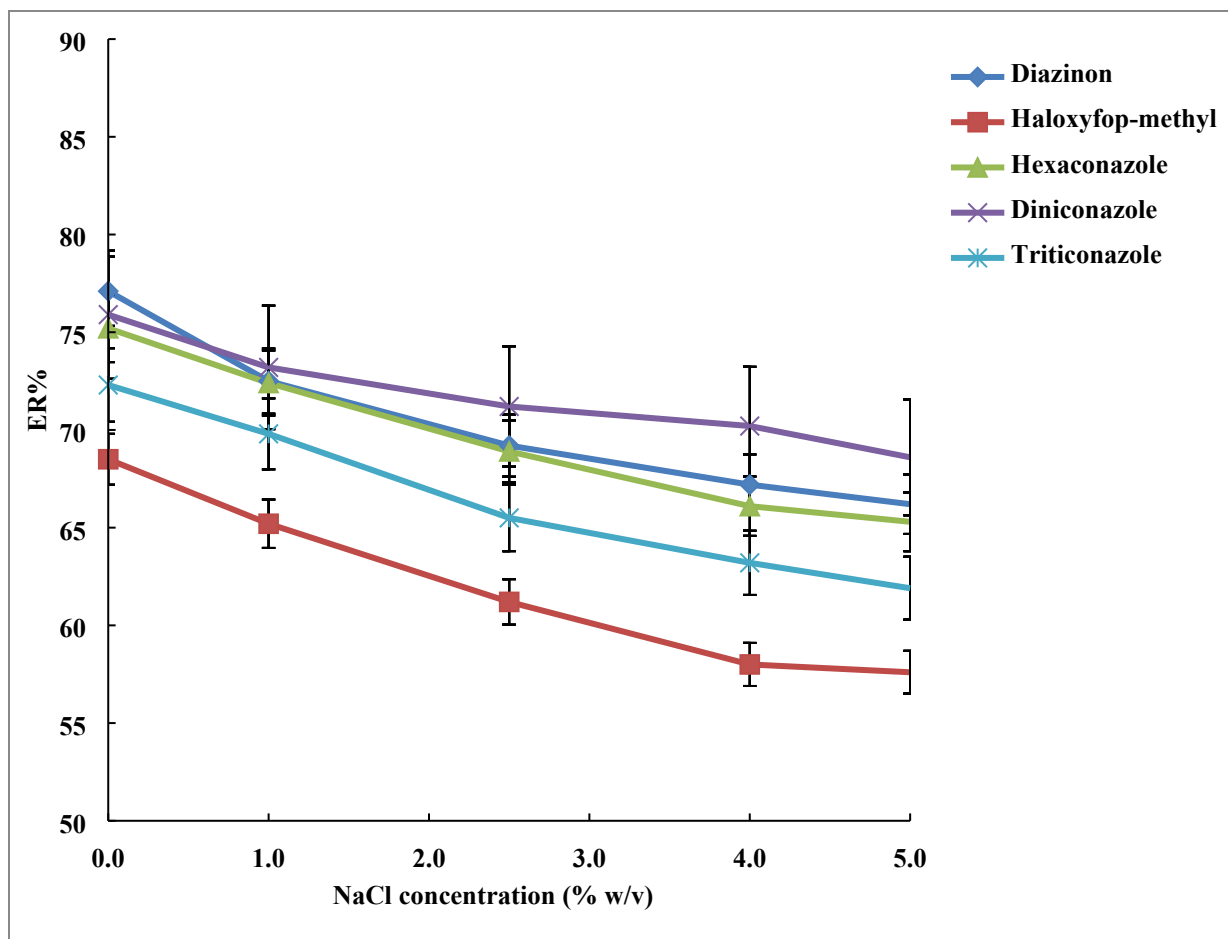

Fig. S3. Salt effect

Extraction conditions: are the same as those used in Fig. S2, except 90  $\mu\text{L}$  of the ferrofluid was chosen as the optimum volume of extraction solvent.
